# Supplementary material for: Inhibitory Effects of Prunella vulgaris L. Extract on 11β‐HSD1 in Human Skin Cells
Source: Hindawi journal article supplement (doi:10.1155/2018/1762478), 2018-01-01
Supplement: f1 [file 1762478.f1.pdf]

Supplementary Figure. 1

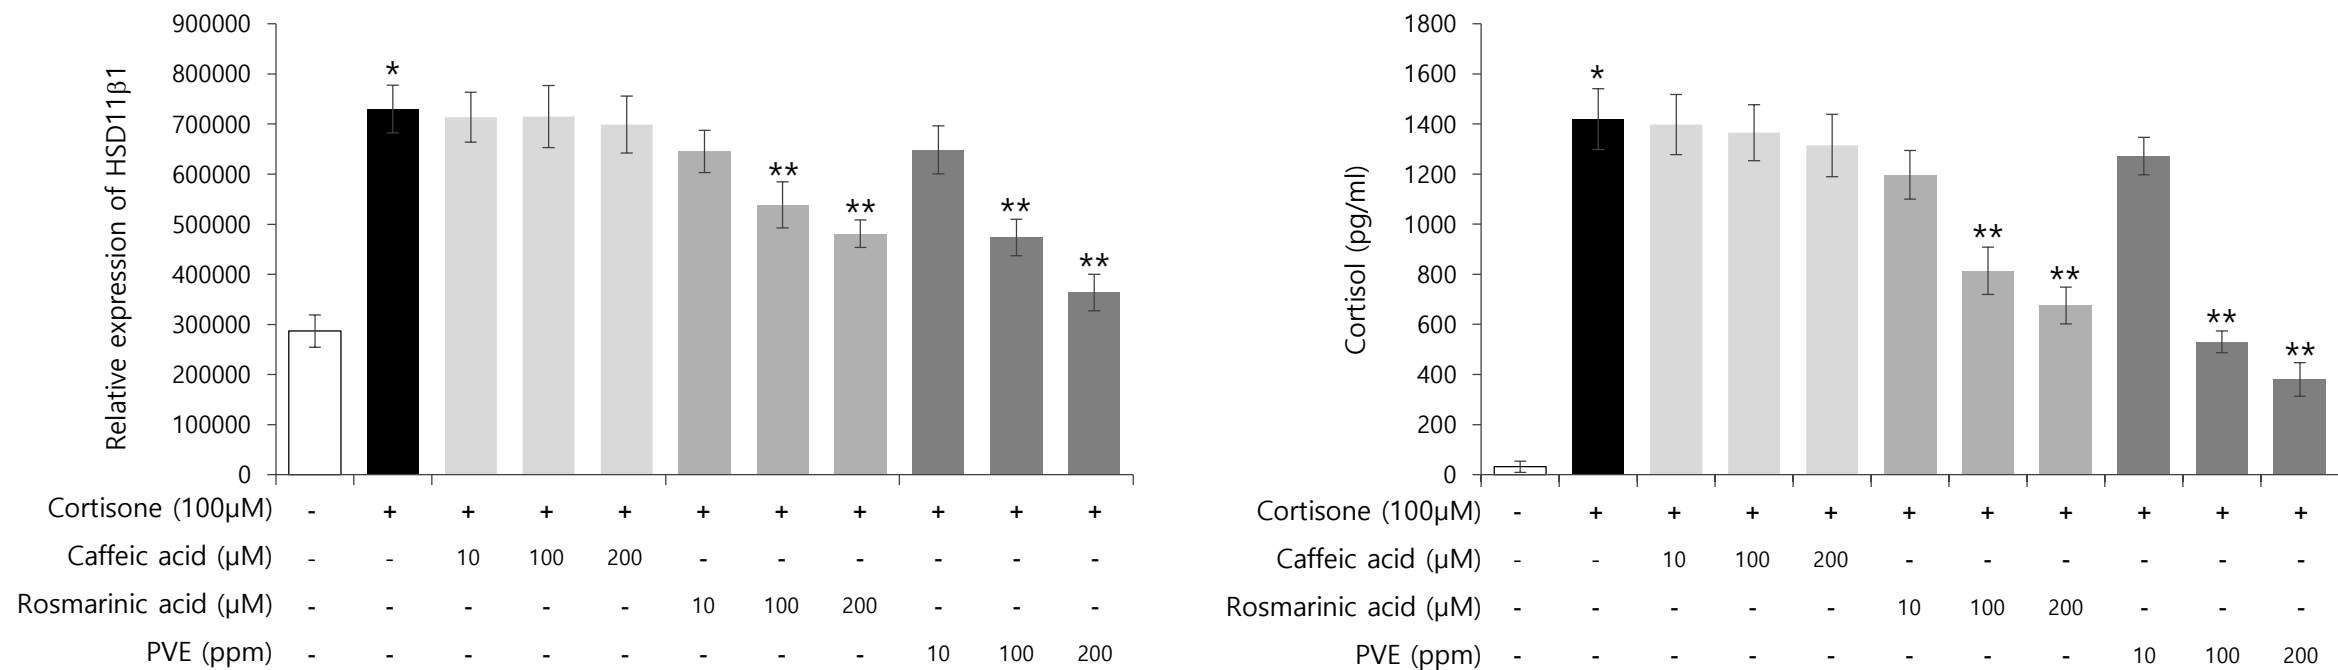

**Supplementary figure 1.** Effects of caffeic acid, rosmarinic acid, and PVE on cortisol production in cortisone-induced HaCaT cells. The HaCaT cells were pretreated with caffeic acid, rosmarinic acid, and PVE for 1 h before treatment with cortisone (100 μM). The concentration of cortisol in the culture medium was measured by ELISA. The results are mean ± standard deviation (SD) (n = 3). \**P* < 0.01 vs. cortisone untreated control, \*\**P* < 0.05 vs. cortisone treated control.
